# Supplementary material for: Durable protection against repeated penile exposures to simian-human immunodeficiency virus by broadly neutralizing antibodies
Source: PubMed Central journal article supplement (PMC7314794; doi:10.1038/s41467-020-16928-9), 2020-06-24
Supplement: 41467_2020_16928_MOESM1_ESM.pdf [file 41467_2020_16928_MOESM1_ESM.pdf]

## **Supplementary Information**

**Durable protection against repeated penile exposures to simian-human  
immunodeficiency virus by broadly neutralizing antibodies**

**Garber et al.**

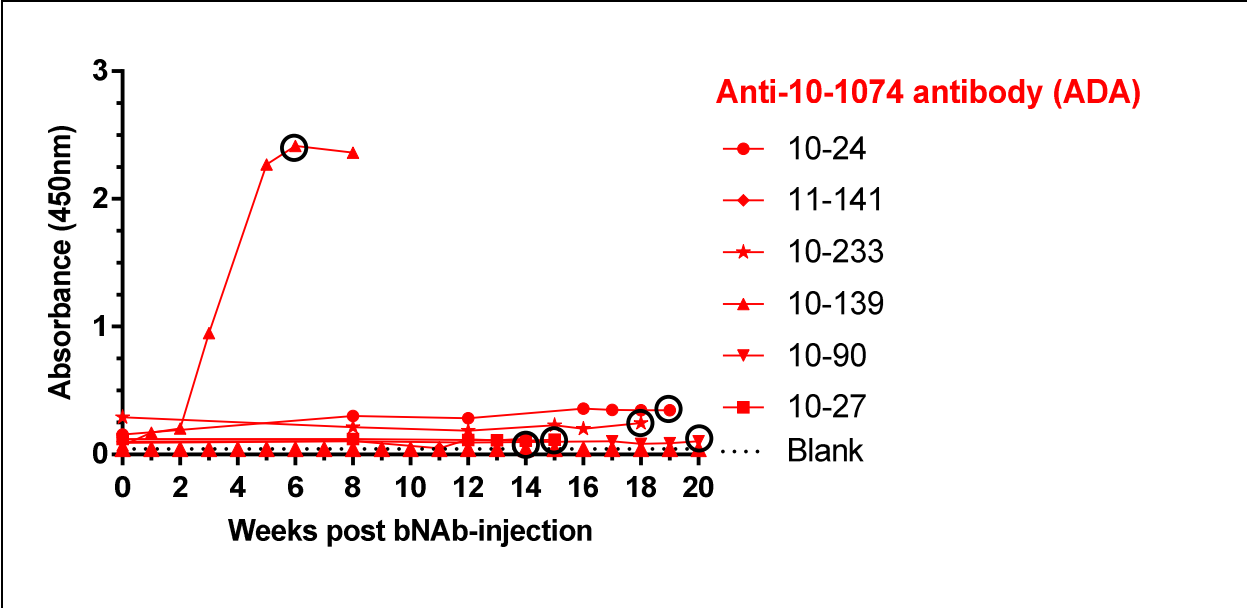

**Supplementary Figure 1. Development of anti-10-1074 antibody responses (ADA) among macaques administered 10-1074 and challenged with SHIV via the penis.** Longitudinal plasma samples were assayed via ELISA for 10-1074-specific IgG responses. Open circles denote the timepoint of SHIV breakthrough for each animal.

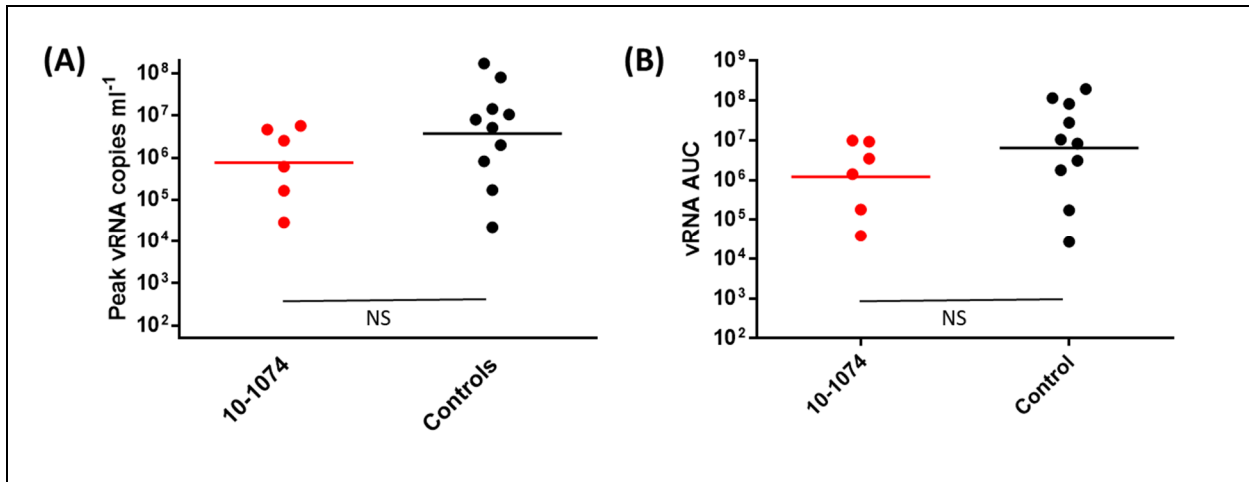

**Supplementary Figure 2. Plasma viremia following penile SHIV<sub>SF162P3</sub> infection**

**(A)** Peak plasma viremia or **(B)** vRNA area under the curve through 7 weeks post-infection following penile SHIV infection among 10-1074-treated macaques or untreated controls. At each timepoint for each macaque, vRNA values were determined as the average of duplicate samples. . Animal group sizes were 6 (10-1074) or 10 (Control), as shown. Lines denote geometric means for each group. NS = not significant (Mann-Whitney test, two-sided).

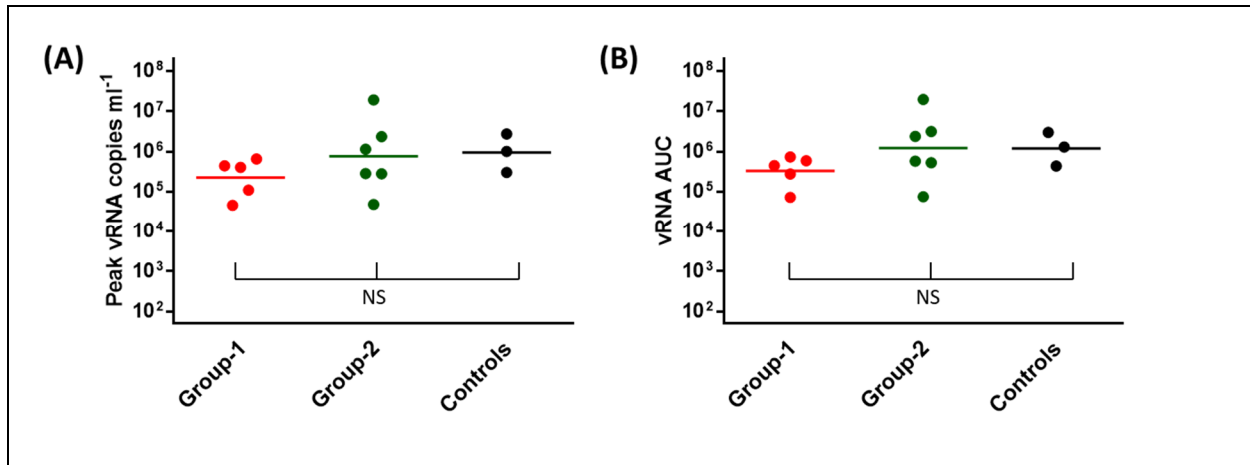

**Supplementary Figure 3. Plasma viremia following vaginal SHIV<sub>AD8-EO</sub> infection**

(A) Peak plasma viremia or (B) vRNA area under the curve through 7 weeks post-infection, following vaginal SHIV acquisition among animals administered a combination of 10-1074 and 3BNC117 (Group-1, N=5), 3BNC117 only (Group-2, N=6) or untreated controls (N=3).

At each timepoint for each macaque, vRNA values were determined as the average of duplicate samples. Lines denote geometric means for each group. NS = not significant (Kruskal-Wallis test, two-sided).

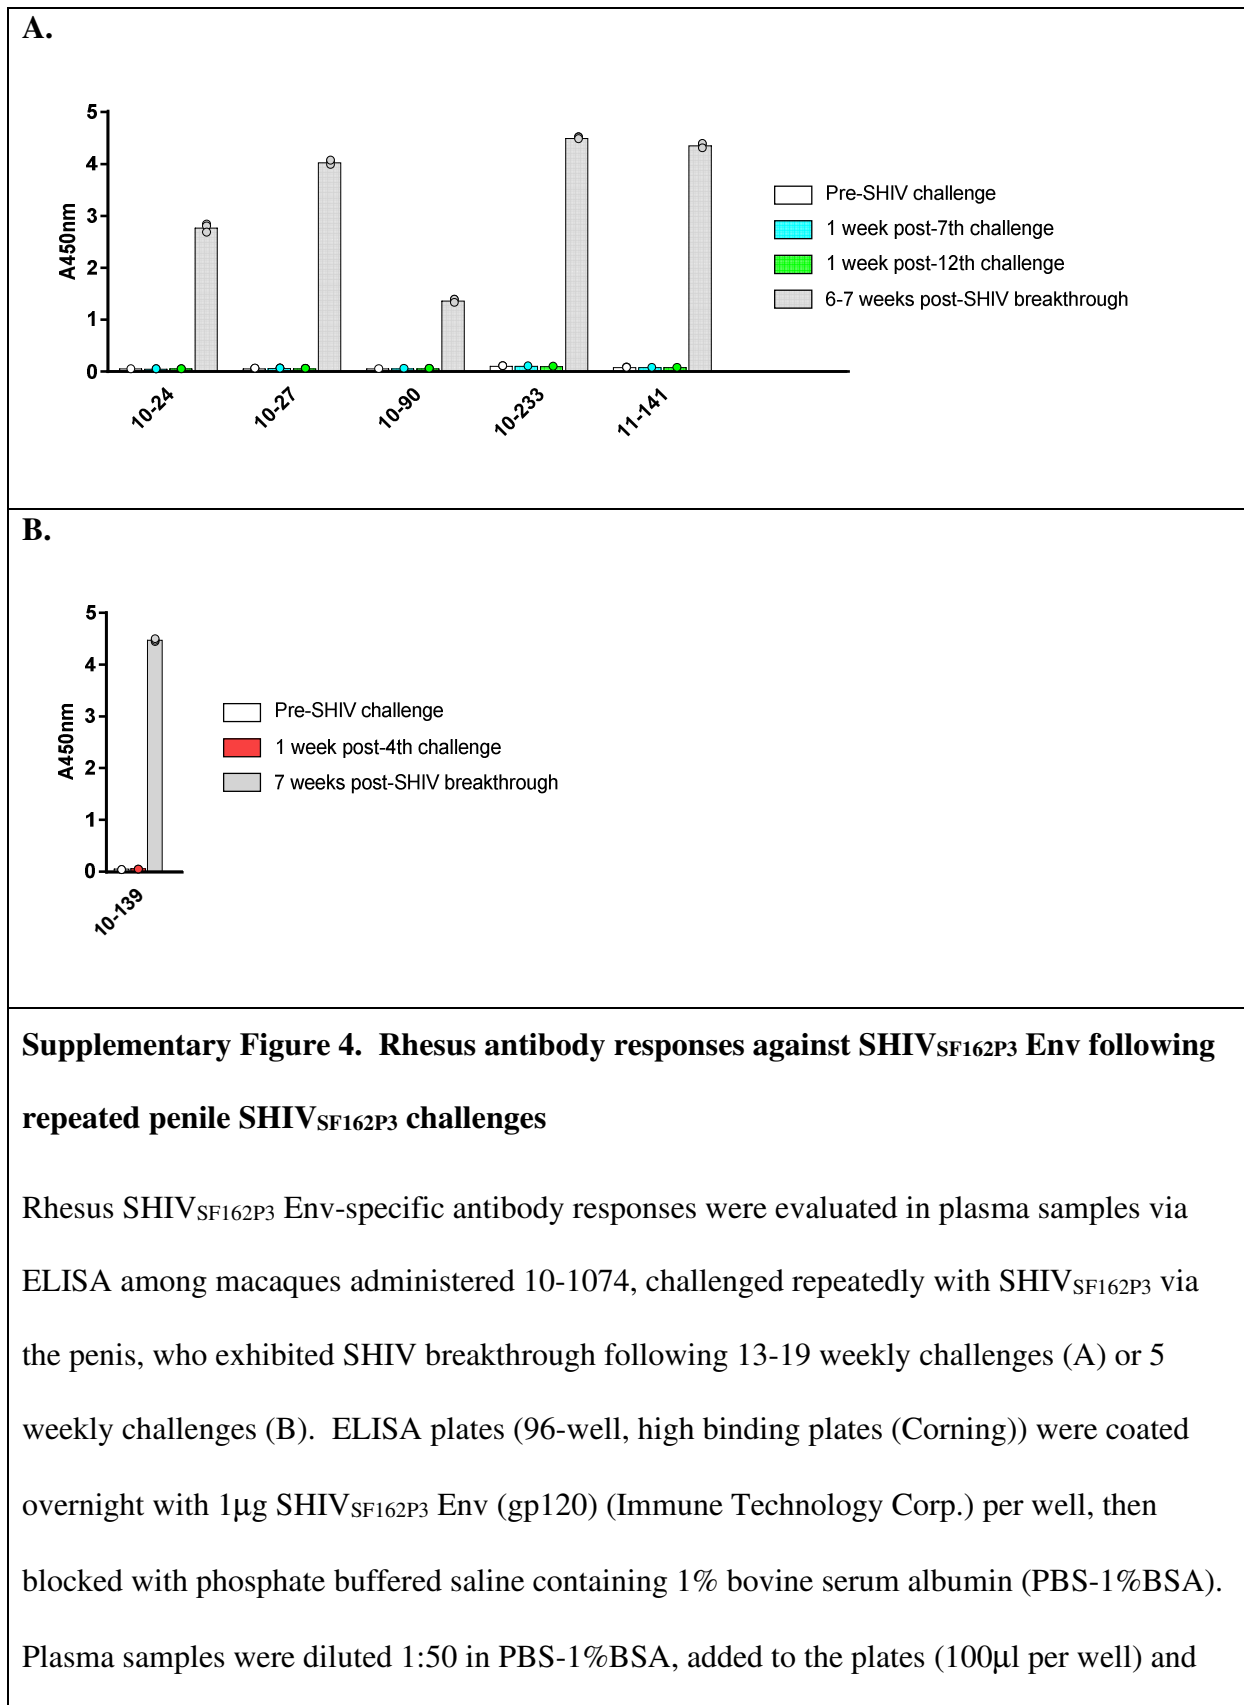

incubated for 1.5 hour at 37°C. Plates were washed and incubated with mouse anti-rhesus IgG heavy chain-horseradish peroxidase (HRP) preadsorbed (Abcam) for 30 minutes at 37°C. Plates were washed and assayed for HRP activity by the addition of tetramethylbenzidine (1-Step Ultra TMB, ThermoFisher). Color development was arrested via the addition of sulfuric acid to a final concentration of 1N and absorbance at 450nm was measured using a BioTek ELx808 plate reader. Plasma samples were assayed in triplicate - individual values (circles) and mean values (bars) are shown. Panels (A) and (B) show representative results from one of two independent experiments.

**Supplementary Table 1. 10-1074 antibody concentration ( $\mu\text{g ml}^{-1}$ ) in macaque plasma following subcutaneous injection at week (-1)**

| <b>10-1074</b> |              |                                                                                                |              |               |               |               |
|----------------|--------------|------------------------------------------------------------------------------------------------|--------------|---------------|---------------|---------------|
| <b>Week</b>    | <b>10-24</b> | <b>10-27</b>  | <b>10-90</b> | <b>10-139</b> | <b>10-233</b> | <b>11-141</b> |
| -1             | <0.10        | <0.10                                                                                          | <0.10        | <0.10         | <0.10         | <0.10         |
| 0              | 40.90        | 24.60                                                                                          | 27.20        | 27.50         | 35.50         | 60.00         |
| 2              | 24.30        | 14.20                                                                                          | 16.40        | 24.70         | 23.00         | 18.80         |
| 4              | 12.40        | 6.40                                                                                           | 10.00        | <0.10         | 13.10         | 9.50          |
| 5              |              |                                                                                                |              | <0.10         |               |               |
| 6              | 6.10         | 3.40                                                                                           | 6.20         |               | 11.00         | 4.20          |
| 8              | 3.40         | 2.10                                                                                           | 2.60         |               | 3.60          | 3.20          |
| 10             | 3.20         | 1.00                                                                                           | 1.70         |               | 3.40          | 1.70          |
| 12             | 1.20         | 0.70                                                                                           | 0.80         |               | 2.20          | 0.70          |
| 13             |              | 0.60                                                                                           |              |               |               | 0.70          |
| 14             | 0.80         | 0.70                                                                                           | 0.40         |               | 1.10          |               |
| 16             | 0.50         |                                                                                                | 0.40         |               | 0.60          |               |
| 17             | 0.30         |                                                                                                |              |               | 0.60          |               |
| 18             | 0.40         |                                                                                                | 0.20         |               |               |               |
| 19             |              |                                                                                                | 0.20         |               |               |               |

**Supplementary Table 2. bNAb concentrations ( $\mu\text{g ml}^{-1}$ ) in plasma of macaques co-administered 3BNC117 and 10-1074 via subcutaneous injections at week (-1)**

| <b>3BNC117</b> |                  |                  |                |                |                |
|----------------|------------------|------------------|----------------|----------------|----------------|
| <b>Week</b>    | <b>RQ-02E035</b> | <b>RQ-02E060</b> | <b>RQ-8433</b> | <b>RQ-8684</b> | <b>RQ-8918</b> |
| -1             | <0.24            | <0.24            | <0.24          | <0.24          | <0.24          |
| 0              | 5.20             | 6.00             | 2.00           | 8.50           | 7.90           |
| 1              | 3.60             | 4.20             | 1.00           | 5.60           | 4.30           |
| 2              | 2.90             | 2.20             | 0.60           | 3.30           | 3.40           |
| 3              | 1.90             | 1.40             | <0.24          | 4.20           | 1.60           |
| 4              | 1.10             | 0.60             | <0.24          | 1.80           | 1.20           |
| 5              | 0.70             | 0.50             | <0.24          | 0.60           | 0.50           |
| 6              | 0.80             | <0.24            | <0.24          | 0.50           | 0.30           |
| 7              | 0.30             | <0.24            | <0.24          | 0.40           | <0.24          |
| 8              | <0.24            | <0.24            | <0.24          | <0.24          | <0.24          |
| 9              | <0.24            | <0.24            | <0.24          | <0.24          | <0.24          |
| <b>10-1074</b> |                  |                  |                |                |                |
| <b>Week</b>    | <b>RQ-02E035</b> | <b>RQ-02E060</b> | <b>RQ-8433</b> | <b>RQ-8684</b> | <b>RQ-8918</b> |
| -1             | <0.07            | <0.07            | <0.07          | <0.07          | <0.07          |
| 0              | 51.10            | 35.10            | 26.10          | 36.60          | 29.60          |
| 1              | 24.40            | 17.20            | 15.30          | 25.90          | 13.70          |
| 2              | 12.80            | 9.80             | 9.50           | 13.60          | 12.00          |
| 3              | 12.40            | 5.90             | 6.20           | 11.00          | 7.10           |
| 4              | 7.30             | 3.60             | 5.50           | 9.60           | 4.60           |
| 5              | 4.20             | 2.80             | 4.10           | 4.90           | 2.20           |
| 6              | 3.00             | 1.80             | 2.30           | 4.10           | 1.70           |
| 7              | 2.10             | 1.40             | 1.40           | 3.60           | 1.00           |
| 8              | 1.60             | 0.80             | 0.90           | 1.70           | 0.80           |
| 9              | 1.00             | 0.60             | 0.60           | 1.40           | 0.40           |
| 10             | 0.50             | 0.20             | 0.20           | 0.50           | 0.10           |
| 11             | 0.30             | 0.10             | 0.10           | 0.30           | <0.07          |
| 12             | 0.20             | <0.07            | 0.10           | 0.30           | <0.07          |
| 13             | 0.10             | <0.07            | <0.07          | 0.20           | <0.07          |
| 14             | 0.10             | <0.07            | <0.07          | <0.07          | <0.07          |
| 15             | <0.07            | <0.07            | <0.07          | <0.07          | <0.07          |
| 16             | <0.07            | <0.07            | <0.07          | <0.07          | <0.07          |
| 17             | <0.07            | <0.07            | <0.07          | <0.07          | <0.07          |
| 18             | <0.07            | <0.07            | <0.07          | <0.07          | <0.07          |



**Supplementary Table 3. 3BNC117 antibody concentration ( $\mu\text{g ml}^{-1}$ ) in plasma of macaques administered 3BNC117 singly via subcutaneous injection at week (-1)**

| <b>3BNC117</b> |               |                |                |                |                |                |
|----------------|---------------|----------------|----------------|----------------|----------------|----------------|
| <b>Week</b>    | <b>07-155</b> | <b>RQ-8011</b> | <b>RQ-8428</b> | <b>RQ-8944</b> | <b>RQ-9200</b> | <b>RQ-9207</b> |
| <b>-1</b>      | <0.24         | <0.24          | <0.24          | <0.24          | <0.24          | <0.24          |
| <b>0</b>       | 4.90          | 8.30           | 8.70           | 1.70           | 7.70           | 10.50          |
| <b>1</b>       | 2.70          | 5.20           | 5.40           | 1.60           | 6.90           | 4.50           |
| <b>2</b>       | 1.80          | 3.70           | 3.60           | 0.90           | 5.90           | 2.90           |
| <b>3</b>       | 0.90          | 1.60           | 2.40           | 0.70           | 2.60           | 1.30           |
| <b>4</b>       | 0.40          | 0.60           | 1.00           | 0.40           | 2.10           | 0.80           |
| <b>5</b>       | <0.24         | <0.24          | 1.10           | 0.30           | 1.80           | 0.50           |
| <b>6</b>       | <0.24         | <0.24          | 0.70           | <0.24          | 1.00           | <0.24          |
| <b>7</b>       | <0.24         | <0.24          | 0.30           | <0.24          | 0.80           | <0.24          |
| <b>8</b>       | <0.24         | <0.24          | <0.24          | <0.24          | <0.24          | <0.24          |
| <b>9</b>       | <0.24         | <0.24          | <0.24          | <0.24          | <0.24          | <0.24          |
